# Supplementary material for: Weighting functional diversity by extinction risk obscures ecological strategies.
Source: Research Square preprint supplement (doi:10.21203/rs.3.rs-8775267/v1), 2026-02-16

**Appendix**

Aurèle Toussaint1

1 Centre de Recherche sur la Biodiversité et l’Environnement (CRBE), Université de Toulouse, Toulouse INP, CNRS, IRD 118 route de Narbonne, 31062 Toulouse, France

Author note

Correspondence concerning this article should be addressed to Aurèle Toussaint, (CRBE, 118 route de Narbonne, 31062 Toulouse, France). E-mail: [aurele.toussaint@cnrs.fr](mailto:aurele.toussaint@cnrs.fr)

# Appendix: Methods

Table S1. Principal component analysis (PCoA) of trait data for the different trait spaces

a. combined-trait space

|  | PC1 | PC2 | PC3 | PC4 |
| --- | --- | --- | --- | --- |
| %Variance | 40.964 | 17.209 | 9.776 | 8.556 |
| %Cumulative | 40.964 | 58.174 | 67.950 | 76.506 |
| blc | 0.797 | -0.241 | 0.079 | 0.166 |
| bln | 0.728 | -0.176 | 0.133 | 0.159 |
| bwd | 0.825 | -0.122 | -0.140 | -0.117 |
| bdp | 0.853 | -0.081 | -0.138 | -0.161 |
| trl | 0.724 | -0.393 | -0.253 | -0.186 |
| wl | 0.955 | -0.185 | 0.057 | 0.046 |
| kd | 0.787 | 0.017 | 0.401 | 0.173 |
| s1 | 0.884 | -0.281 | -0.248 | -0.099 |
| hwl | 0.367 | 0.214 | 0.620 | 0.248 |
| tll | 0.763 | -0.191 | -0.159 | 0.041 |
| bmA | 0.954 | -0.175 | -0.061 | -0.066 |
| ls | 0.021 | -0.012 | 0.052 | -0.453 |
| bmL | 0.953 | -0.175 | -0.061 | -0.067 |
| inc | 0.743 | -0.169 | 0.251 | 0.140 |
| lg | 0.752 | 0.003 | 0.009 | 0.054 |
| fled | 0.725 | -0.040 | 0.294 | 0.173 |
| ly | -0.533 | 0.374 | -0.134 | -0.029 |
| svl | 0.962 | -0.191 | -0.019 | 0.014 |
| DI | -0.511 | -0.810 | -0.091 | 0.025 |
| DVd | 0.324 | -0.054 | 0.153 | 0.047 |
| DVt | 0.285 | -0.169 | 0.078 | 0.041 |
| DVf | 0.330 | -0.117 | 0.250 | 0.127 |
| DVk | 0.091 | -0.038 | 0.011 | 0.009 |
| DSv | 0.224 | -0.044 | 0.086 | 0.040 |
| DF | 0.229 | 0.555 | -0.689 | 0.317 |
| DN | -0.200 | 0.409 | 0.547 | 0.480 |
| DSd | 0.053 | 0.443 | 0.133 | -0.801 |
| DP | 0.303 | 0.185 | 0.111 | -0.293 |

1. M-trait space

|  | PC1 | PC2 |
| --- | --- | --- |
| %Variance | 69.239 | 16.007 |
| %Cumulative | 69.239 | 85.246 |
| blc | 0.837 | -0.087 |
| bln | 0.764 | -0.056 |
| bwd | 0.844 | -0.197 |
| bdp | 0.859 | -0.242 |
| trl | 0.762 | -0.422 |
| wl | 0.975 | 0.099 |
| kd | 0.790 | 0.609 |
| s1 | 0.916 | -0.299 |
| hwl | 0.351 | 0.929 |
| tll | 0.801 | -0.168 |
| bmA | 0.955 | -0.093 |

1. L-trait space

|  | PC1 | PC2 |
| --- | --- | --- |
| %Variance | 71.080 | 15.789 |
| %Cumulative | 71.080 | 86.869 |
| ls | -0.005 | -0.995 |
| bmL | 0.977 | -0.071 |
| inc | 0.803 | 0.137 |
| lg | 0.758 | 0.155 |
| fled | 0.755 | 0.120 |
| ly | -0.581 | 0.114 |
| svl | 0.988 | -0.026 |

1. D-trait space

|  | PC1 | PC2 | PC3 | PC4 |
| --- | --- | --- | --- | --- |
| %Variance | 40.769 | 18.812 | 14.663 | 8.868 |
| %Cumulative | 40.769 | 59.580 | 74.243 | 83.111 |
| DI | -0.950 | -0.132 | -0.136 | -0.108 |
| DVd | 0.100 | 0.109 | 0.219 | 0.567 |
| DVt | -0.017 | 0.056 | 0.130 | 0.426 |
| DVf | 0.032 | 0.109 | 0.199 | 0.530 |
| DVk | 0.006 | 0.008 | 0.024 | 0.053 |
| DSv | 0.054 | 0.053 | 0.082 | 0.188 |
| DF | 0.636 | -0.717 | -0.211 | -0.058 |
| DN | 0.217 | 0.121 | 0.809 | -0.503 |
| DSd | 0.424 | 0.659 | -0.505 | -0.233 |
| DP | 0.304 | 0.253 | -0.078 | 0.155 |

##

## Sensitivity of prioritisation overlap to threshold choice

To evaluate the robustness of prioritisation overlap to the choice of threshold defining highly prioritised species, I repeated all overlap analyses using alternative percentile cut-offs. For each trait space and for the phylogenetic ranking, species were ranked according to both risk-free and risk-weighted distinctiveness metrics. Priority sets were defined as the top 10%, 15%, 20%, and 25% of species in each ranking.

For each threshold, overlap among priority sets was quantified using the Jaccard similarity index, calculated for all pairwise combinations of functional trait spaces and between functional and phylogenetic facets. This procedure was applied independently to risk-free and risk-weighted metrics. Patterns were considered robust when qualitative differences between intrinsic and risk-weighted metrics were conserved across thresholds.

Across all alternative thresholds, prioritisation outcomes based on risk-free metrics remained weakly concordant across functional trait spaces, with low Jaccard similarity values indicating limited overlap among priority sets. In contrast, extinction-risk–weighted metrics consistently showed substantially higher overlap among functional spaces, with Jaccard similarity increasing monotonically with threshold size. Importantly, the qualitative contrast between intrinsic and risk-weighted metrics was preserved across all thresholds considered, indicating that the convergence induced by extinction-risk weighting does not depend on a specific definition of highly prioritised species.


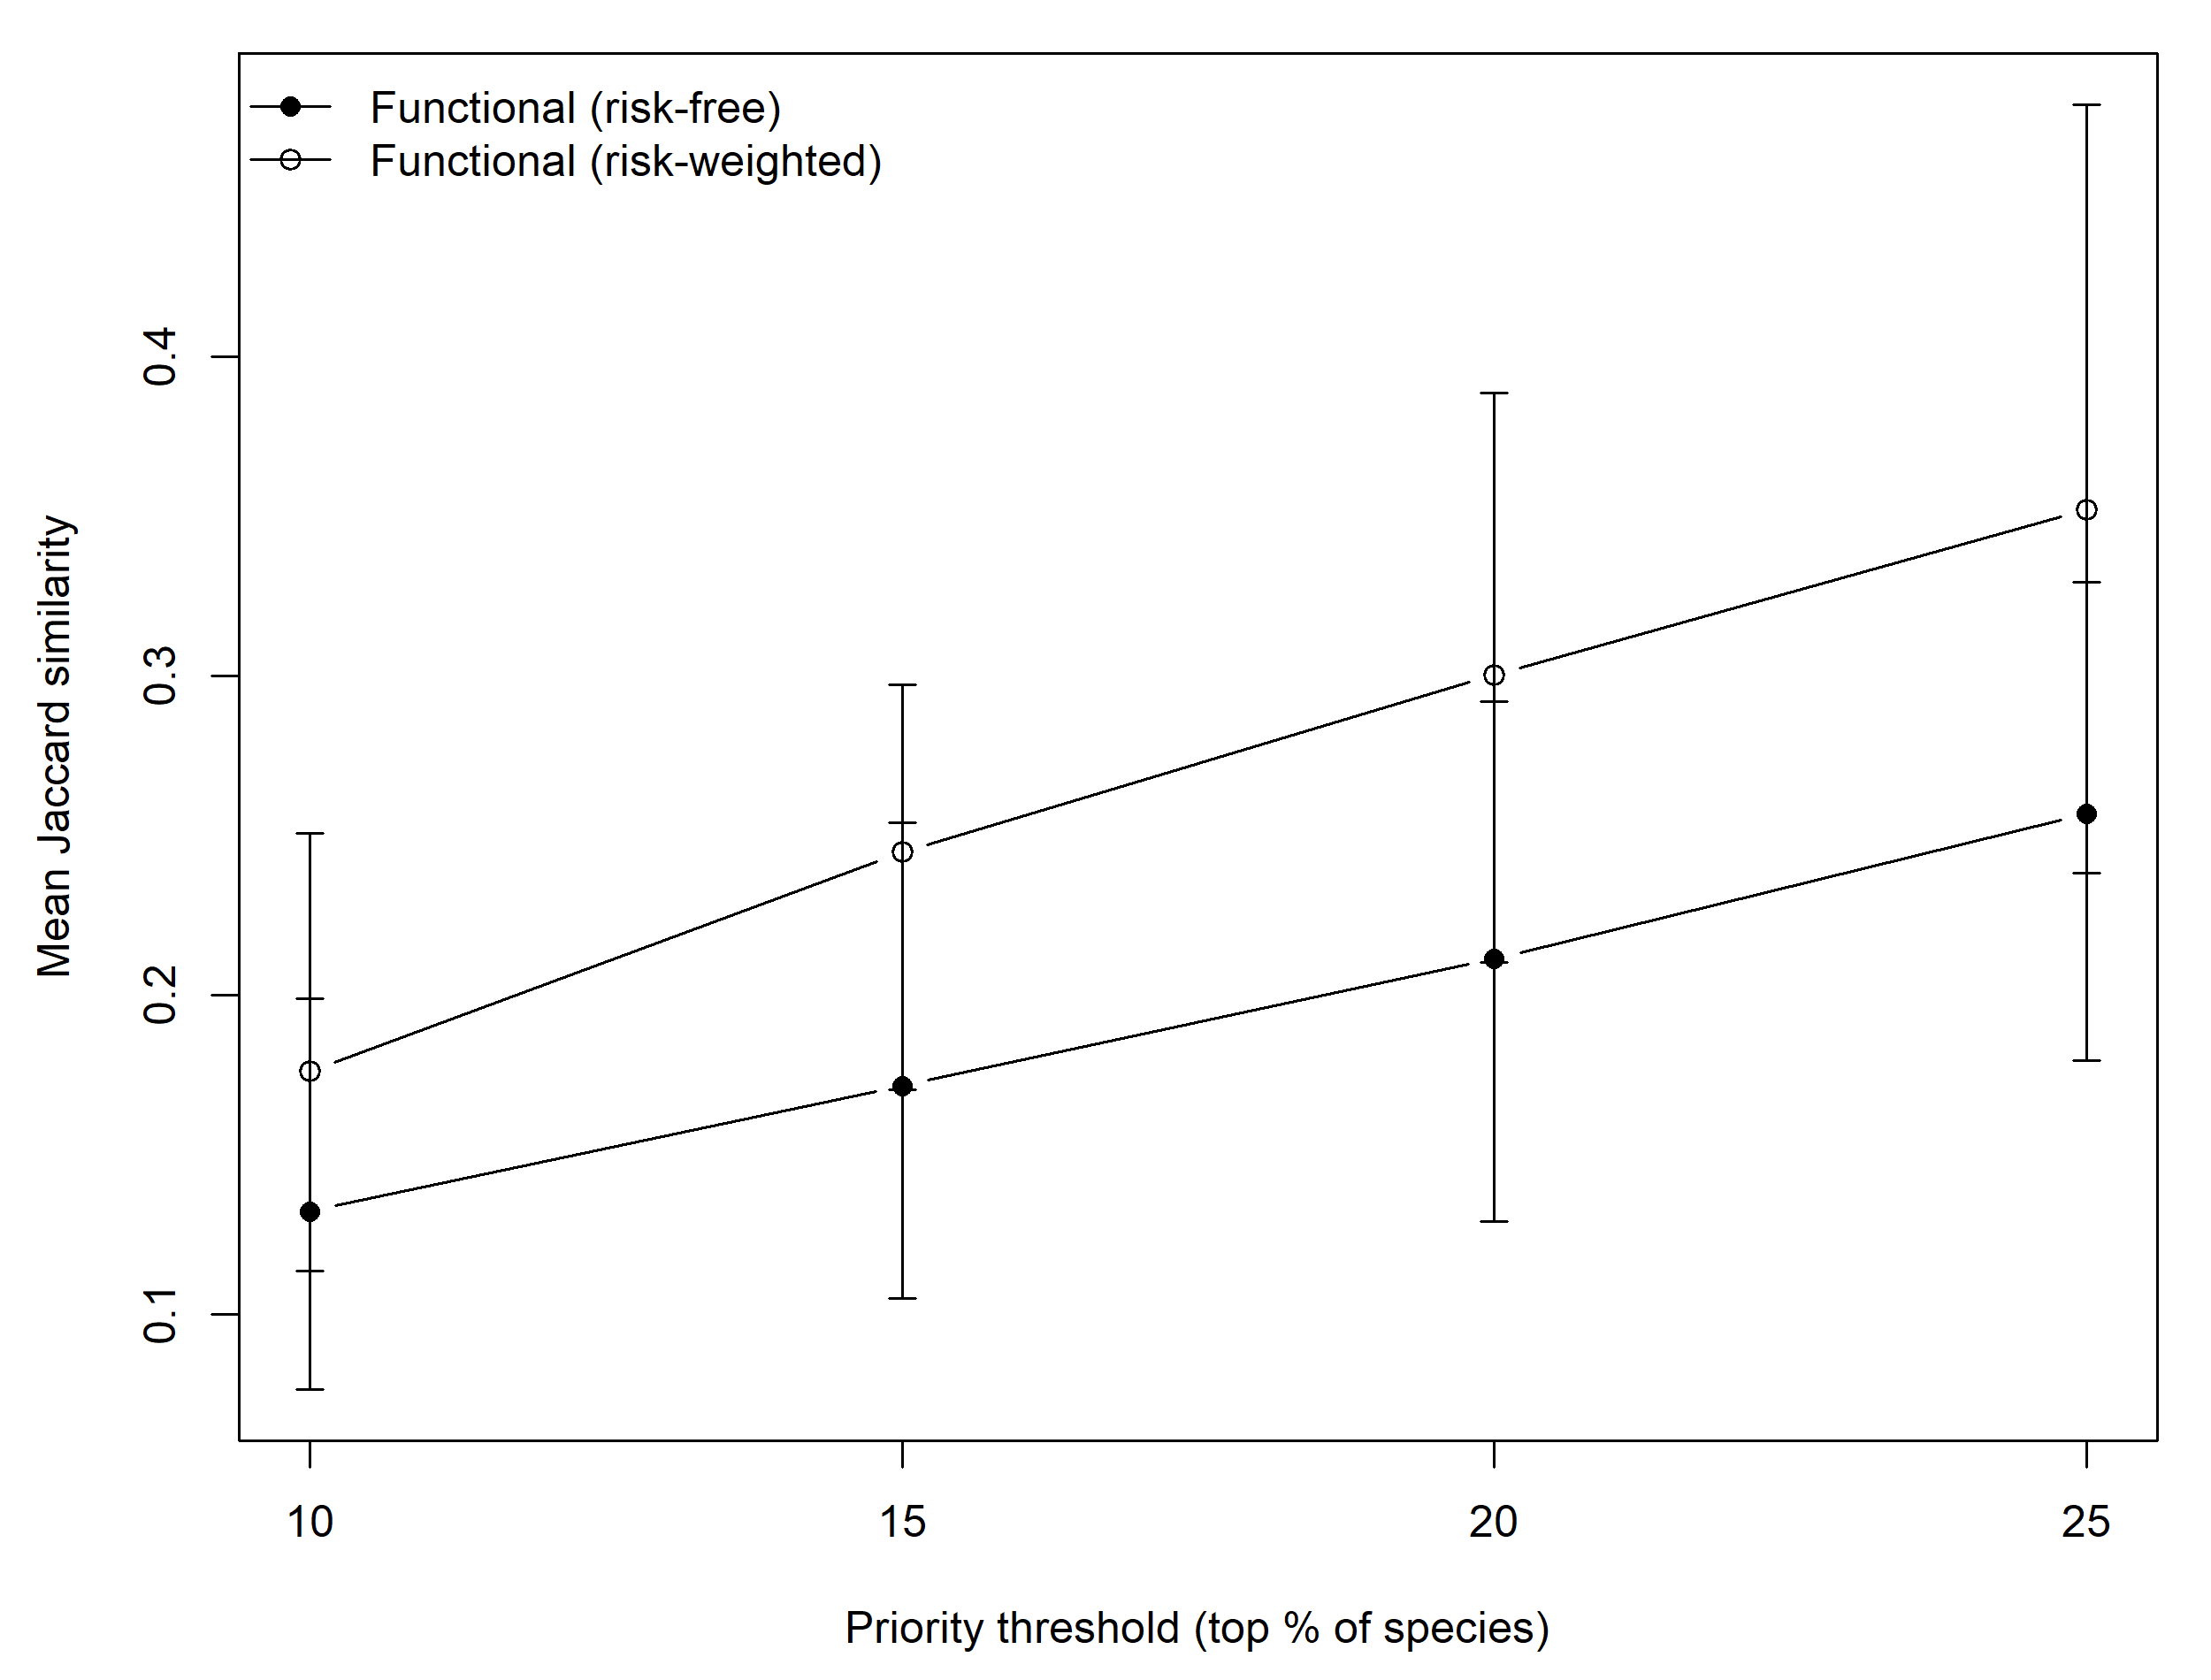

Supplement: Supplementary file 1 [file 7d386ef40b6fd0792373362d.docx]
